# Supplementary material
Source: publisher figshare collection journal article supplement (https://gsajournals.figshare.com/ndownloader/files/26708585)
Supplement: Supplementary file 1 [file 26708585]

## Sheet: Table S3
Table S3.
Module	N genes	N imprinted	Binomial P, enriched for imprinted	count on X list	Binomial P, enriched on X	Pvalue, ANOVA Placental weight ~ module eigengene + age and sex	Pvalue, ANOVA Embryo weight ~ module eigengene + age and sex	Overlap with Upreg. F1 module	Overlap with Downreg. F1 module
Placenta-associated
*downregulated module; black	432	33	2.2e-16	25	0.006276	0.0007323	N/A*	2	206
*upregulated module; brown	828	0	0.01214	29	0.6951	0.0008744	N/A*	40	38
darkturquoise	65	0	1	5	0.06139	0.003634	N/A*	1	2
yellow	575	1	0.2779	12	0.1262	0.0001309	N/A*	3	174
skyblue	31	0	1	1	1	0.007249	N/A*	0	8
red	471	0	0.128	20	0.2409	0.0155	N/A*	4	81
white	47	1	0.2517	2	0.6669	0.01016	N/A*	0	4
Not Placenta-associated
cyan	180	0	0.6331	1	0.03377	N/A*	N/A*	4	19
gray60	163	3	0.08017	2	0.184	N/A*	N/A*	2	24
tan	229	7	0.000607	3	0.1318	N/A*	0.2467	3	43
lightgreen	122	0	1	2	0.4453	N/A*	N/A*	1	20
darkgray	65	0	1	2	1	N/A*	N/A*	3	12
royalblue	86	0	1	1	0.5339	N/A*	N/A*	2	12
gray	3349	12	0.05923	96	0.2062	N/A*	N/A*	194	244
greenyellow	245	0	0.4131	6	0.5906	N/A*	N/A*	18	15
purple	296	0	0.2725	8	0.7429	N/A*	0.4032	13	14
turquoise	1171	0	0.001206	35	0.6807	N/A*	N/A*	169	32
lightyellow	89	0	1	3	0.7677	N/A*	N/A*	10	2
darkorange	51	0	1	1	1	N/A*	N/A*	4	0
lightcyan	174	0	0.6319	2	0.135	N/A*	N/A*	3	18
magenta	346	2	1	11	1	N/A*	N/A*	21	10
green	480	3	0.7721	17	0.6994	N/A*	N/A*	36	54
salmon	198	1	1	13	0.01534	N/A*	N/A*	10	24
orange	53	0	1	1	1	N/A*	0.1147	0	9
pink	407	3	0.7431	25	0.002969	N/A*	N/A*	6	24
darkgreen	66	0	1	2	1	N/A*	N/A*	0	10
blue	923	1	0.05281	35	0.3542	N/A*	N/A*	7	31
darkred	74	3	0.0109	2	1	N/A*	N/A*	1	10
midnightblue	180	0	0.6331	9	0.2017	N/A*	N/A*	8	20
